# Supplementary material
Source: publisher figshare collection journal article supplement (https://frontiersin.figshare.com/ndownloader/files/28007076)
Supplement: Supplementary file [file 28007076]

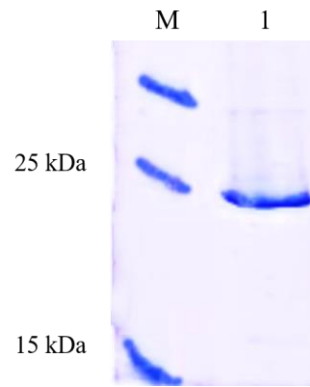

**Supplementary Figure 3.** SDS-PAGE of purified pET-22b-His tagged Vfr protein from *E. coli* BL21. M: Protein standard marker; 1: pure Vfr protein.
